# Supplementary material for: Optimization of Substrate Sizes for In Situ Stress Measurement in Electrodeposits Relying on Nonlinear Effects
Source: MDPI journal article supplement (doi:10.3390/coatings13122031), 2023-11-30
Supplement: s1 [file s1]

# Supplementary Information

## Optimization of Substrate Sizes for In Situ Stress Measurement in Electrodeposits Relying on Nonlinear Effects

*Jun Qiang*<sup>1,2</sup>, *Tao Peng*<sup>3,\*</sup>

<sup>1</sup>School of Mechanical Engineering, Ningxia University, Yinchuan 750021, China

<sup>2</sup>State Key Laboratory of Precision Manufacturing for Extreme Service Performance, College of Mechanical and Electrical Engineering, Central South University, Changsha 410083, China

<sup>3</sup>Zhuhai UM Science and Technology Research Institute, Zhuhai 519085, China

\*Corresponding author.

E-mail addresses: zumri.taopeng@um.edu.mo

**Table.S1** The major ingredients of electrolyte and the working condition

| Ingredient of electrolyte / (g · L <sup>-1</sup> ) |                 |            |                    | Working condition |         |
|----------------------------------------------------|-----------------|------------|--------------------|-------------------|---------|
| Nickel sulphamidate                                | Nickel chloride | Boric acid | Ethylhexyl sulfate | Temperature / °C  | pH      |
| 400                                                | 10              | 30         | 10                 | 25                | 3.5-4.5 |

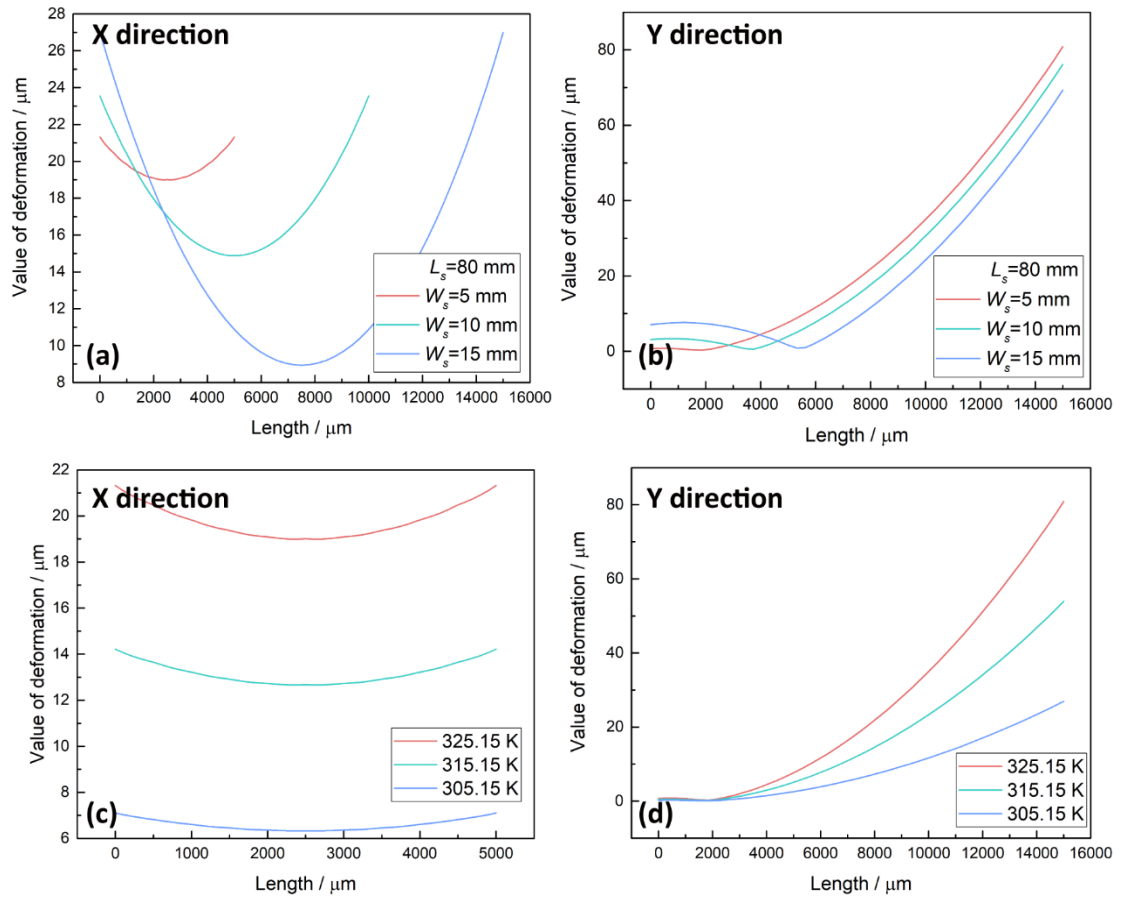

**Figure S1.** The deformations of the substrate-deposit system in x and y directions.
